# Supplementary material for: Bayesian alternatives to null hypothesis significance testing in biomedical research: a non-technical introduction to Bayesian inference with JASP
Source: PubMed Central journal article supplement (PMC7275319; doi:10.1186/s12874-020-00980-6), 2020-06-05

# Heart Rate: Factorial 2 x 2 Between Subjects ANOVA

**Description:**  
 This data set, "Heart Rate", provides heart rates of male and female runners and generally sedentary participants following 6 minutes exercise.

- Variables:**
- Gender** - Participant's gender (Female, Male).
  - Group** - Group of 'Runners' (averaging more than 15 miles per week) and 'Control' group (generally sedentary participant).
  - Heart Rate** - Heart rate after six minutes of exercise.

This example JASP file demonstrates the use of a 2 x 2 between subjects ANOVA. Specifically, we test whether heart rates differ between gender and groups.

**References:**  
 Moore, D. S., McCabe, G. P., and Craig, B. A. (2012). *Introduction to the Practice of Statistics* (7th ed.). New York: Freeman.  
 Wood, P.D, Haskell, W. L., Stern, M. P., Lewis, S. and Perry, C. (1977). Plasma lipoprotein distributions in male and female runners. *Annals of the New York Academy of Sciences*, 301: 748-763.

## ANOVA

We conduct a two-way ANOVA of differences between Males and Females, Runners and Controls and their interaction. All terms are statistically significant. Note that the interaction explains only 0.4% of the variance of heart rates.

| Cases          | Sum of Squares | df      | Mean Square | F       | p      | VS-MPR*     | $\eta^2$ |
|----------------|----------------|---------|-------------|---------|--------|-------------|----------|
| Gender         | 45030.005      | 1.000   | 45030.005   | 185.980 | < .001 | 1.296e +35  | 0.110    |
| Group          | 168432.080     | 1.000   | 168432.080  | 695.647 | < .001 | 1.264e +107 | 0.413    |
| Gender * Group | 1794.005       | 1.000   | 1794.005    | 7.409   | 0.007  | 11.062      | 0.004    |
| Residual       | 192729.830     | 796.000 | 242.123     |         |        |             |          |

Note: Type III Sum of Squares  
 \* Vovk-Selkic Maximum p-Ratio: Based on the p-value, the maximum possible odds in favor of H<sub>1</sub> over H<sub>0</sub> equals 1/(e<sup>-p</sup> log(p)) for p ≤ .37 (Selkic, Bayarri, & Berger, 2001).

### Assumption Checks

| Test for Equality of Variances (Levene's) |       |         |        |         |
|-------------------------------------------|-------|---------|--------|---------|
| F                                         | df1   | df2     | p      | VS-MPR* |
| 5.562                                     | 3.000 | 796.000 | < .001 | 59.104  |

\* Vovk-Selkic Maximum p-Ratio: Based on the p-value, the maximum possible odds in favor of H<sub>1</sub> over H<sub>0</sub> equals 1/(e<sup>-p</sup> log(p)) for p ≤ .37 (Selkic, Bayarri, & Berger, 2001).

Levene's test of equal variances suggests that the assumption of normality is violated. However, the balanced design (200 participants in each sample) and high power (800 participants in total) mean that the ANOVA will be relatively robust (see descriptives at the bottom). See also Richter & Peyton (2003).

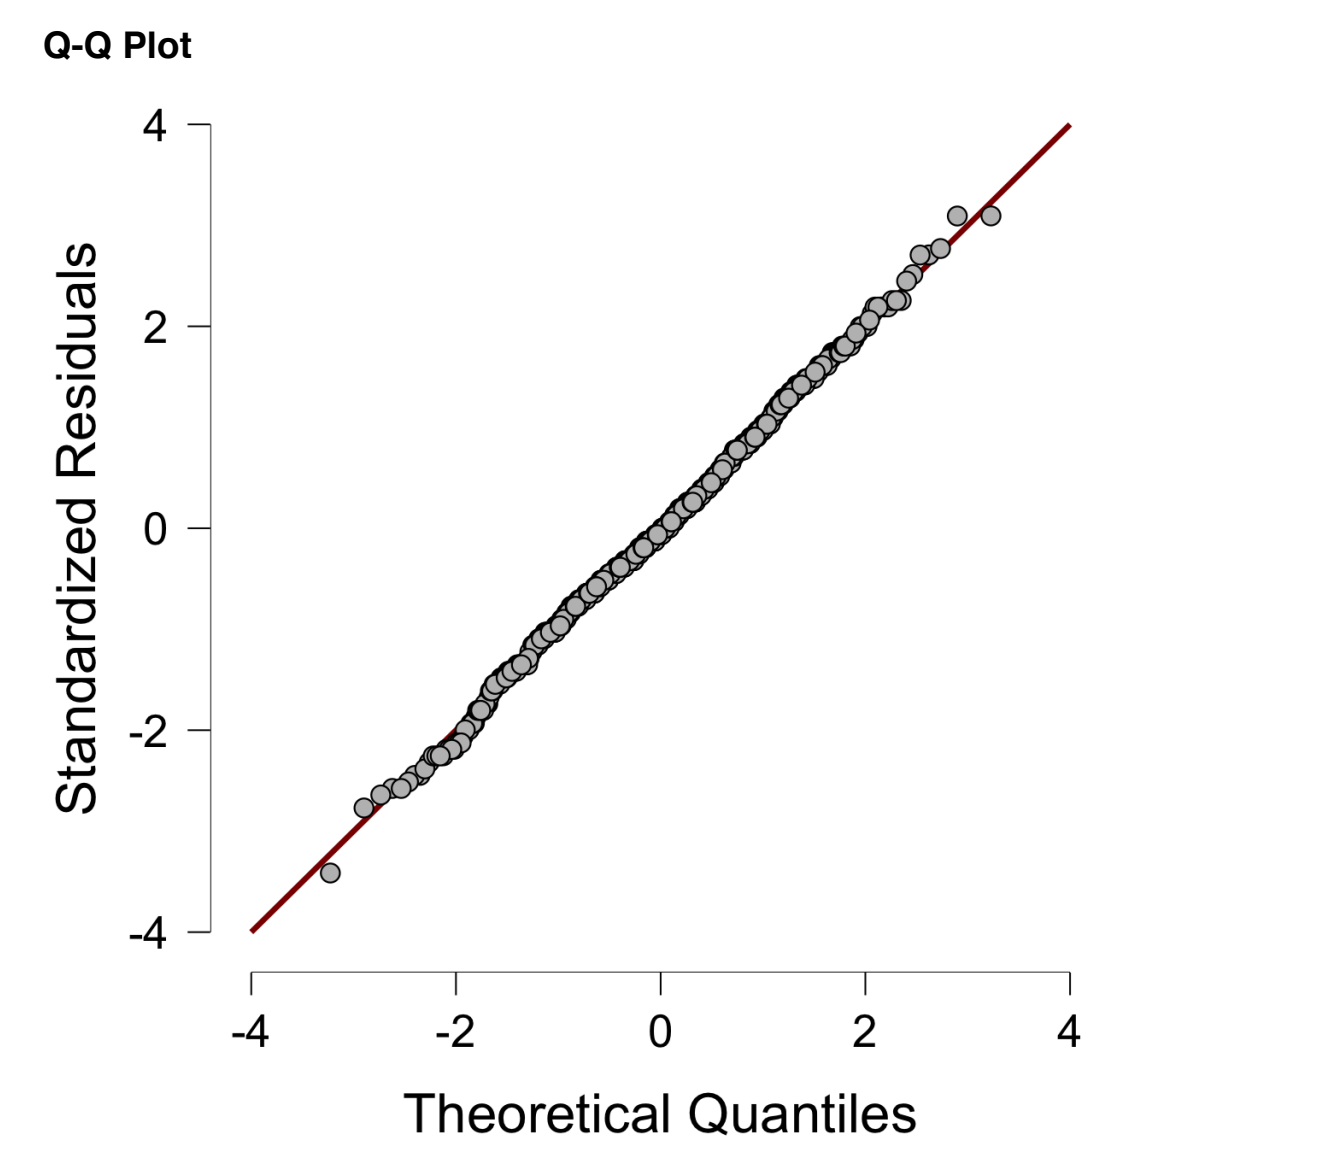

The Q-Q plot suggests no violation of normality.

### Marginal Means

| Marginal Means - Gender |               |       |         |         |
|-------------------------|---------------|-------|---------|---------|
| Gender                  | Marginal Mean | SE    | 95% CI  |         |
|                         |               |       | Lower   | Upper   |
| Female                  | 131.993       | 0.778 | 130.465 | 133.520 |
| Male                    | 116.987       | 0.778 | 115.460 | 118.515 |

| Marginal Means - Group |               |       |         |         |
|------------------------|---------------|-------|---------|---------|
| Group                  | Marginal Mean | SE    | 95% CI  |         |
|                        |               |       | Lower   | Upper   |
| Control                | 139.000       | 0.778 | 137.473 | 140.527 |
| Runners                | 109.980       | 0.778 | 108.453 | 111.507 |

### Descriptives

| Descriptives - Heart Rate |         |         |        |     |
|---------------------------|---------|---------|--------|-----|
| Gender                    | Group   | Mean    | SD     | N   |
| Female                    | Control | 148.000 | 16.271 | 200 |
|                           | Runners | 115.985 | 15.972 | 200 |
| Male                      | Control | 130.000 | 17.100 | 200 |
|                           | Runners | 103.975 | 12.499 | 200 |

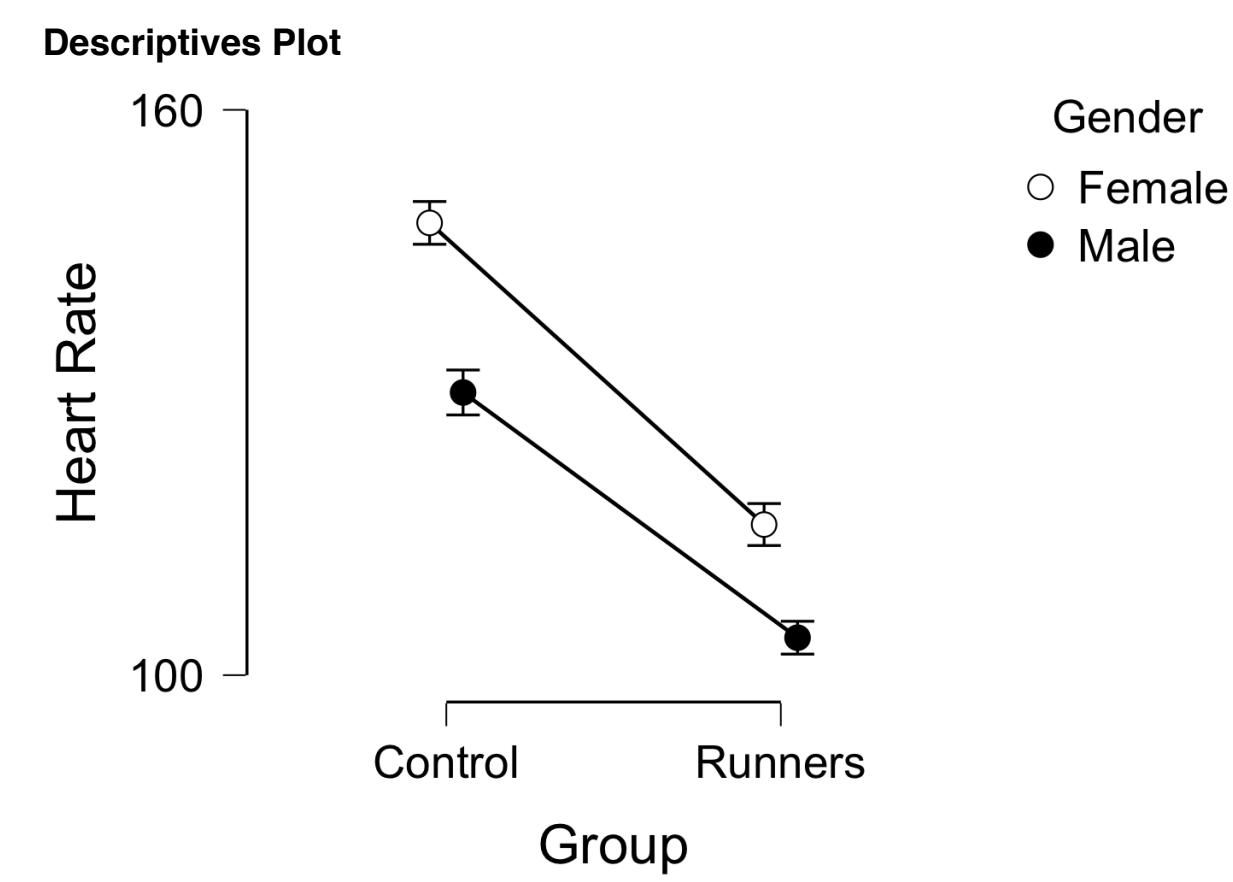

The above plot shows the results. Error bars depict 95% CIs. There is a clear difference between the Control group and the group of Runners, both for Females and Males. Women appear to have a higher heart rate than men. The fact that the two lines are not exactly parallel signifies the interaction effect, which suggests that the differences between the Males and Females is larger in the Control group than in the group of Runners.

### Descriptive Statistics

|          | Heart Rate |         |
|----------|------------|---------|
|          | Control    | Runners |
| Valid    | 400        | 400     |
| Missing  | 0          | 0       |
| Mean     | 139.000    | 109.980 |
| Variance | 359.088    | 241.298 |

### Descriptive Statistics

|          | Heart Rate |         |
|----------|------------|---------|
|          | Female     | Male    |
| Valid    | 400        | 400     |
| Missing  | 0          | 0       |
| Mean     | 131.993    | 116.987 |
| Variance | 516.148    | 393.516 |

### Bayesian ANOVA

| Models                          | P(M)  | P(M data)  | BF <sub>M</sub> | BF <sub>10</sub> | error %   |
|---------------------------------|-------|------------|-----------------|------------------|-----------|
| Null model                      | 0.200 | 2.281e-126 | 9.124e-126      | 1.000            |           |
| Gender + Group + Gender * Group | 0.200 | 0.790      | 15.047          | 3.463e+125       | 2.485     |
| Gender + Group                  | 0.200 | 0.210      | 1.053           | 9.207e+124       | 1.068     |
| Group                           | 0.200 | 6.651e-36  | 2.661e-35       | 2.916e+90        | 2.683e-95 |
| Gender                          | 0.200 | 1.797e-107 | 7.186e-107      | 7.876e+18        | 2.699e-23 |

| Effects        | P(incl) | P(incl data) | BF <sub>incl</sub> |
|----------------|---------|--------------|--------------------|
| Gender         | 0.600   | 1.000        | ∞                  |
| Group          | 0.600   | 1.000        | ∞                  |
| Gender * Group | 0.200   | 0.790        | 15.047             |

| Model Averaged Posterior Summary |                  |         |       |                       |         |
|----------------------------------|------------------|---------|-------|-----------------------|---------|
| Variable                         | Level            | Mean    | SD    | 95% Credible Interval |         |
|                                  |                  |         |       | Lower                 | Upper   |
| Intercept                        |                  | 124.490 | 0.551 | 123.168               | 125.426 |
| Gender                           | Female           | 7.448   | 0.559 | 6.339                 | 8.553   |
|                                  | Male             | -7.448  | 0.559 | -8.586                | -6.373  |
| Group                            | Control          | 14.474  | 0.557 | 13.334                | 15.551  |
|                                  | Runners          | -14.474 | 0.557 | -15.584               | -13.367 |
| Gender * Group                   | Female & Control | 1.465   | 0.547 | 0.378                 | 2.577   |
|                                  | Female & Runners | -1.465  | 0.547 | -2.586                | -0.387  |
|                                  | Male & Control   | -1.465  | 0.547 | -2.586                | -0.387  |
|                                  | Male & Runners   | 1.465   | 0.547 | 0.378                 | 2.577   |

### Model Averaged Posterior Distributions

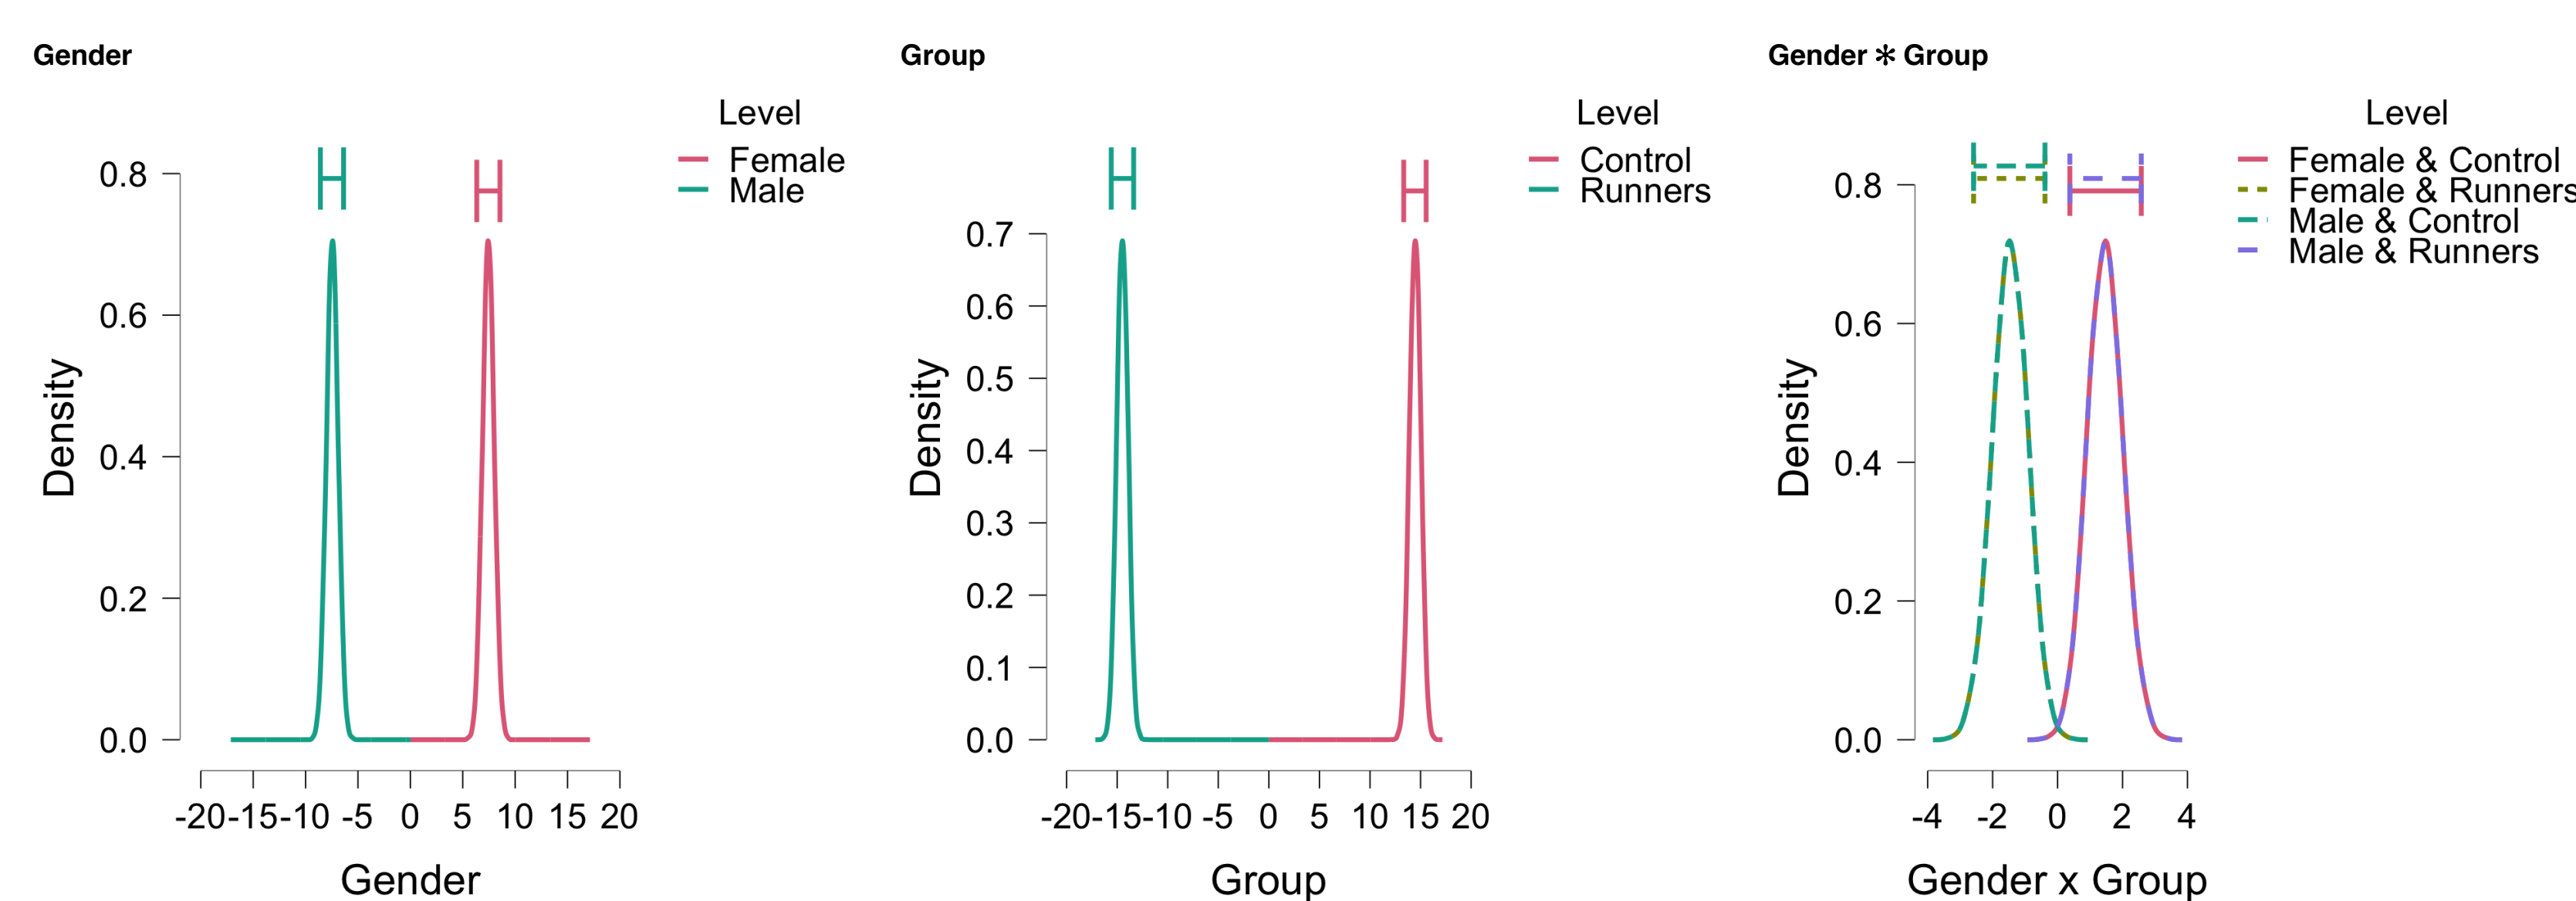

### Model Averaged Q-Q Plot

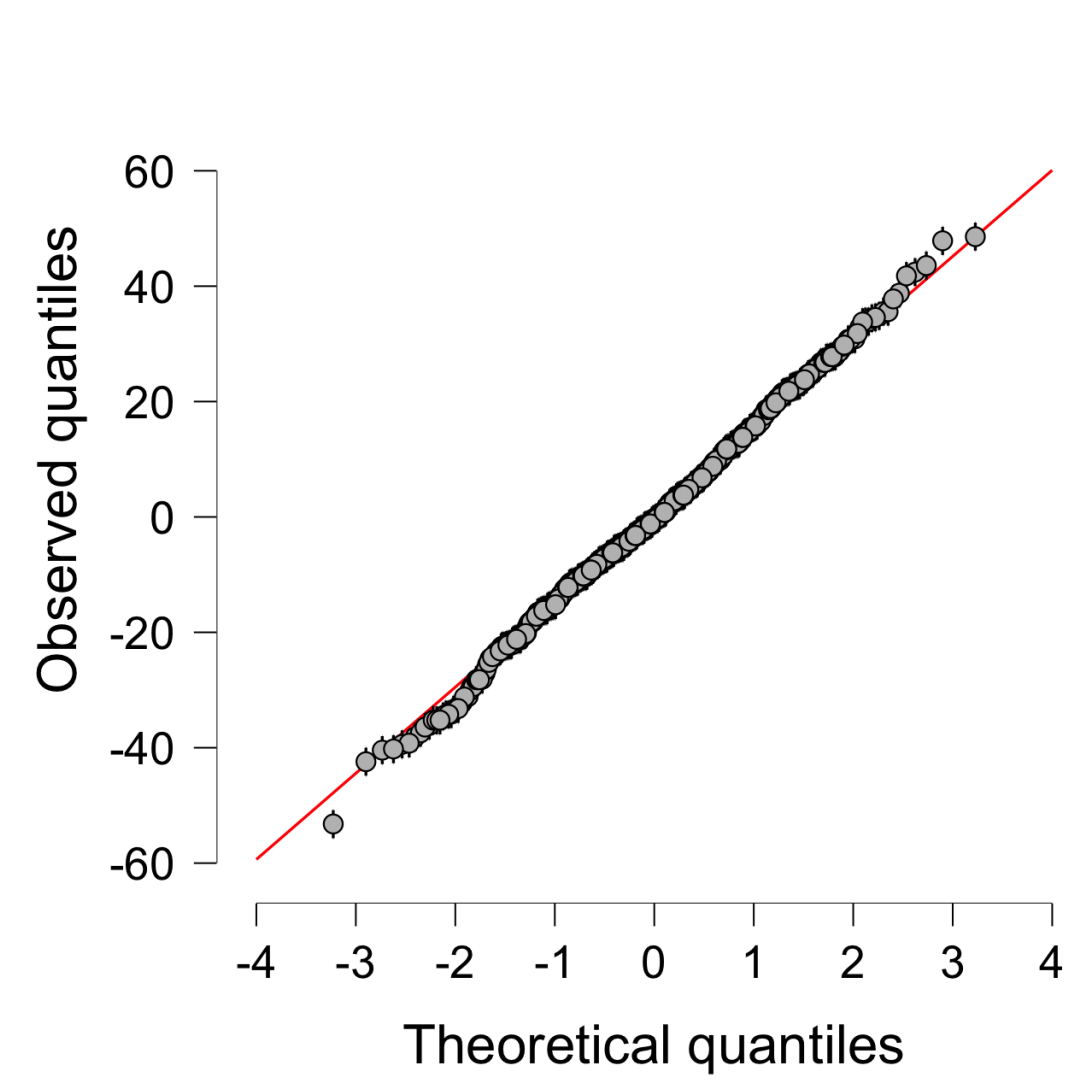

Supplement: 12874_2020_980_MOESM1_ESM.pdf [file 12874_2020_980_MOESM1_ESM.pdf]
