# Supplementary material for: Bayesian alternatives to null hypothesis significance testing in biomedical research: a non-technical introduction to Bayesian inference with JASP
Source: PubMed Central journal article supplement (PMC7275319; doi:10.1186/s12874-020-00980-6), 2020-06-05

# Moon and Aggression: Paired Samples T-Test

## Description:

This data set, "Moon & Aggression", provides the number of disruptive behaviors by dementia patients during two different phases of the lunar cycle (Moore et al, 2012, p. 410). Each row corresponds to one participant.

## Variables:

- **Moon** - The average number of disruptive behaviors during full moon days.
- **Other** - The average number of disruptive behaviors during other days.

This example JASP file demonstrates the use of paired samples t-test. Specifically, we will examine the adequacy of the null hypothesis which states that the average number of disruptive behaviors among patients with dementia does not differ between moon days and other days.

## References:

Moore, D. S., McCabe, G. P., and Craig, B. A. (2012) *Introduction to the Practice of Statistics* (7th ed). New York: Freeman.

"These data were collected as part of a larger study of dementia patients conducted by Nancy Edwards and Alan Beck, Purdue University." (Moore et al, 2012, p. N-8).

## Paired Samples T-Test

| Paired Samples T-Test |         | t     | df | p     | Mean Difference | SE Difference |
|-----------------------|---------|-------|----|-------|-----------------|---------------|
| Moon                  | - Other | 6.452 | 14 | <.001 | 2.433           | 0.377         |

Note. Student's t-test.

The paired samples t-test suggests that the data (or more extreme) are unlikely to occur if the average number of disruptive behaviors was the same during full moon days and other days.

## Assumption Checks

The assumption of normality of differences is not significant. We provisionally retain the null hypothesis that the data are normally distributed.

| Test of Normality (Shapiro-Wilk) |         |  | W     | p     |
|----------------------------------|---------|--|-------|-------|
| Moon                             | - Other |  | 0.913 | 0.148 |

Note. Significant results suggest a deviation from normality.

## Descriptives

During full moon days, patients show disruptive behavior more frequently than during other days.

| Descriptives |    |       |       |       |
|--------------|----|-------|-------|-------|
|              | N  | Mean  | SD    | SE    |
| Moon         | 15 | 3.022 | 1.499 | 0.387 |
| Other        | 15 | 0.589 | 0.445 | 0.115 |

## Descriptives Plot

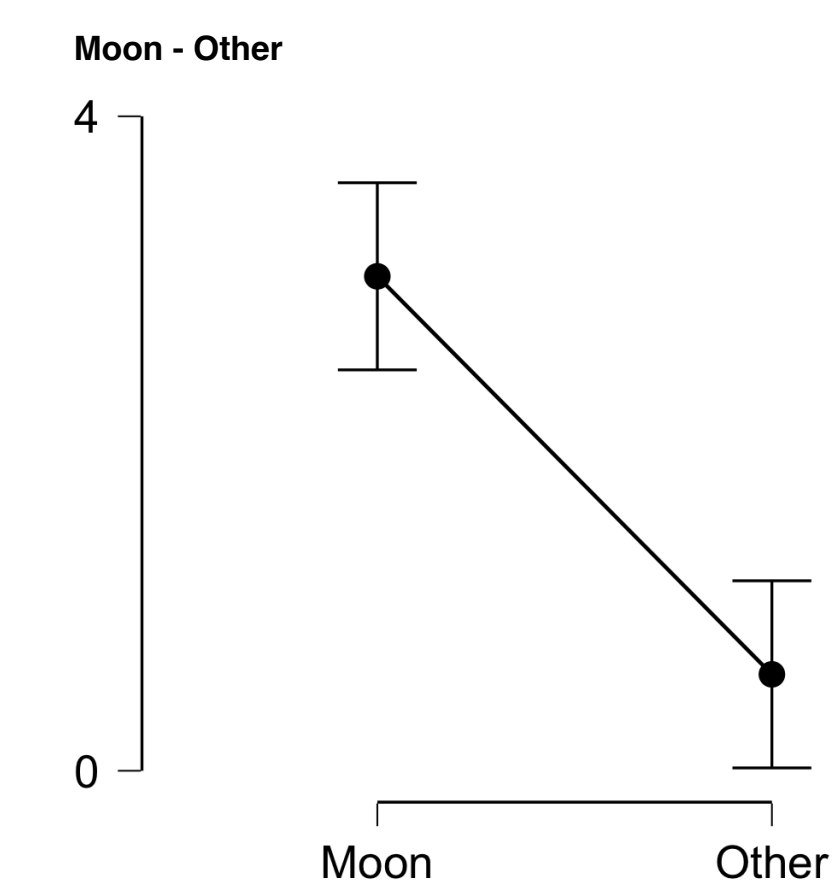

## Bayesian Paired Samples T-Test

| Bayesian Paired Samples T-Test |         |                  |          |
|--------------------------------|---------|------------------|----------|
|                                |         | BF <sub>10</sub> | error %  |
| Moon                           | - Other | 1521.058         | 5.014e-7 |

## Descriptives

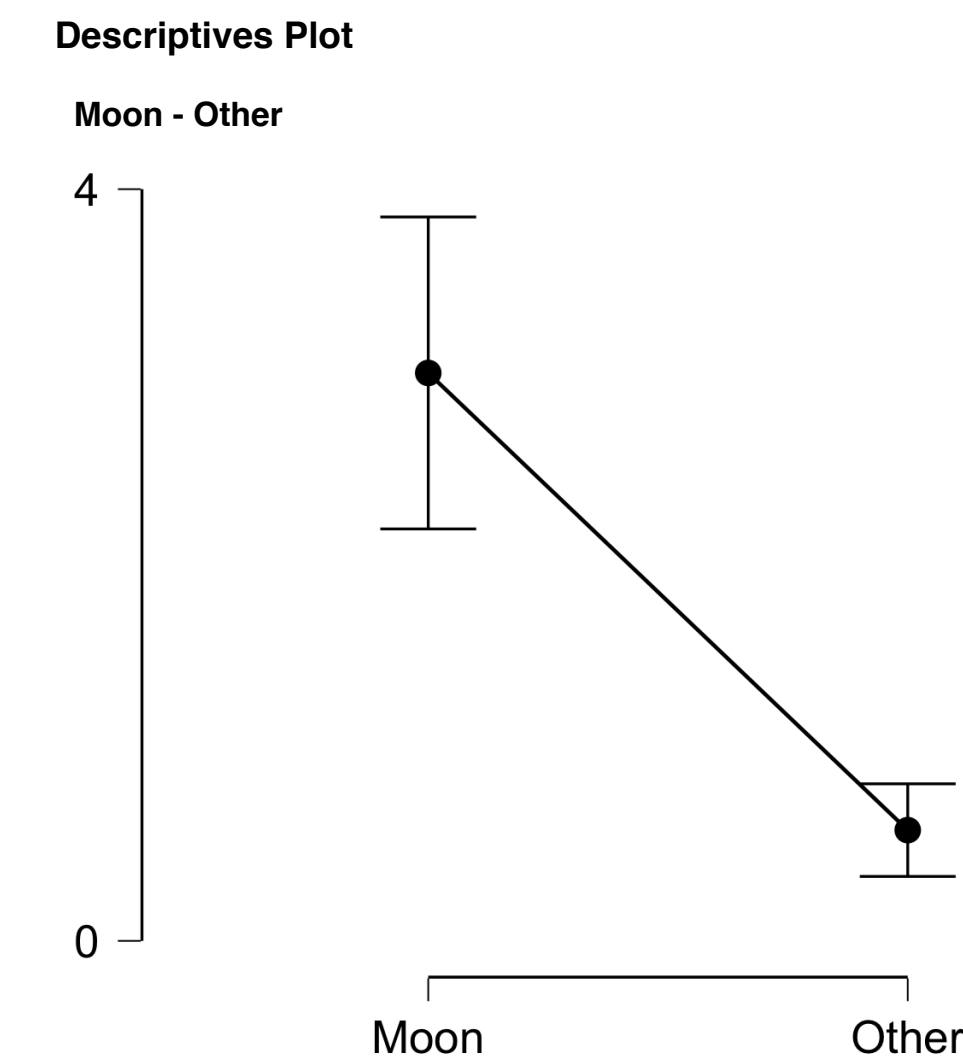

## Inferential Plots

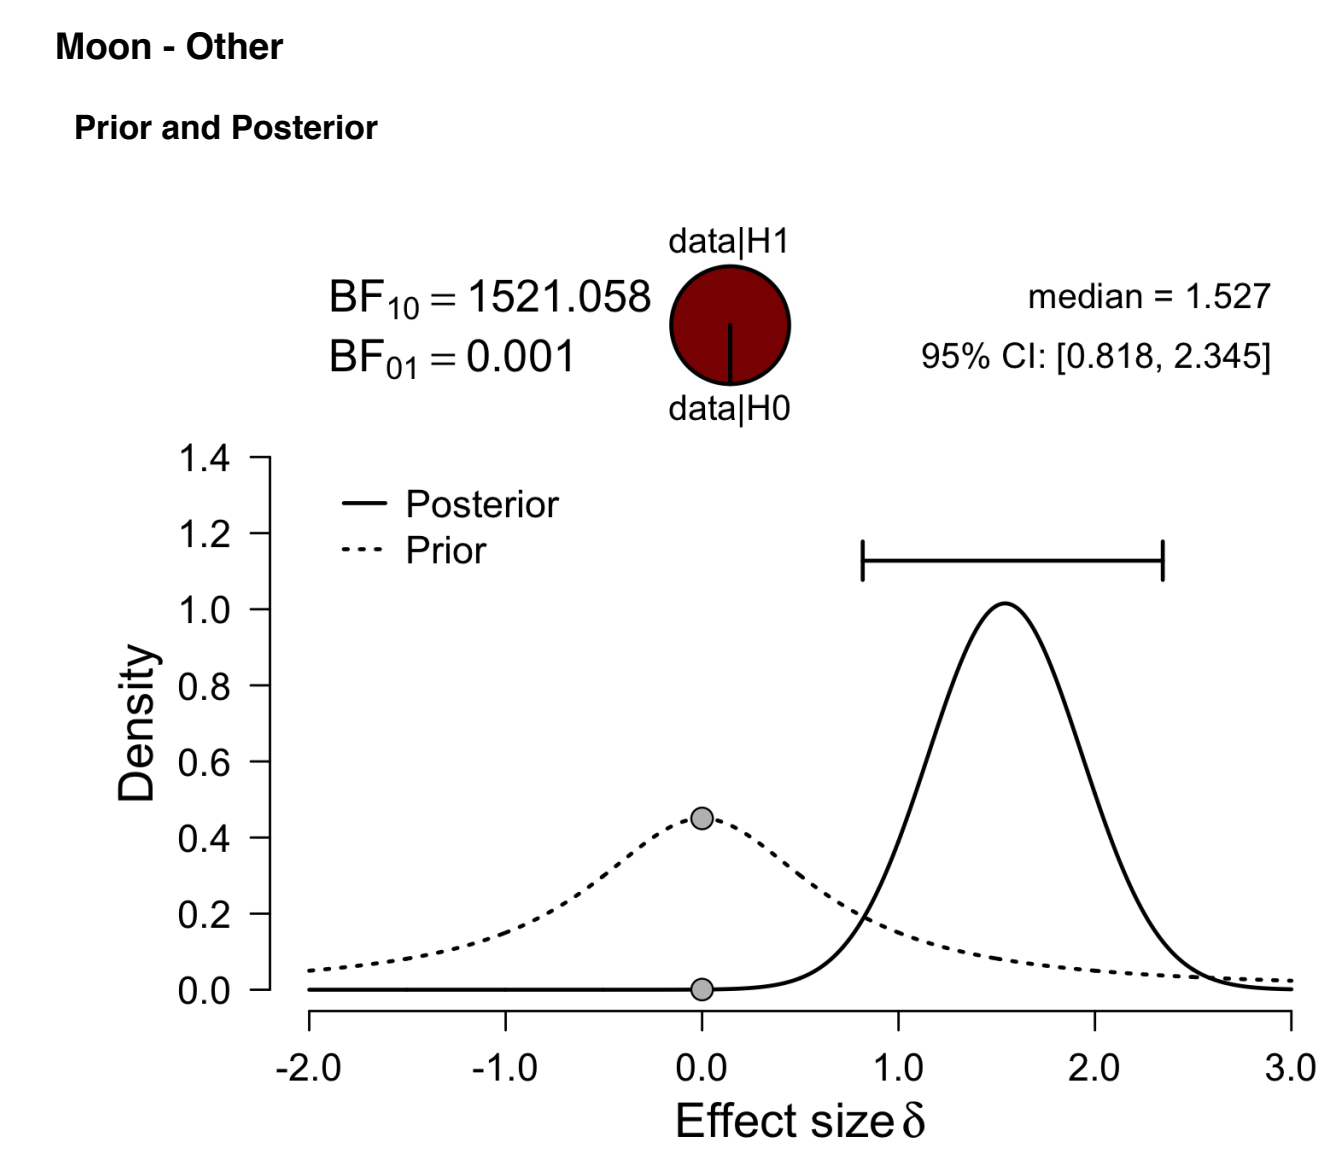

## Bayes Factor Robustness Check

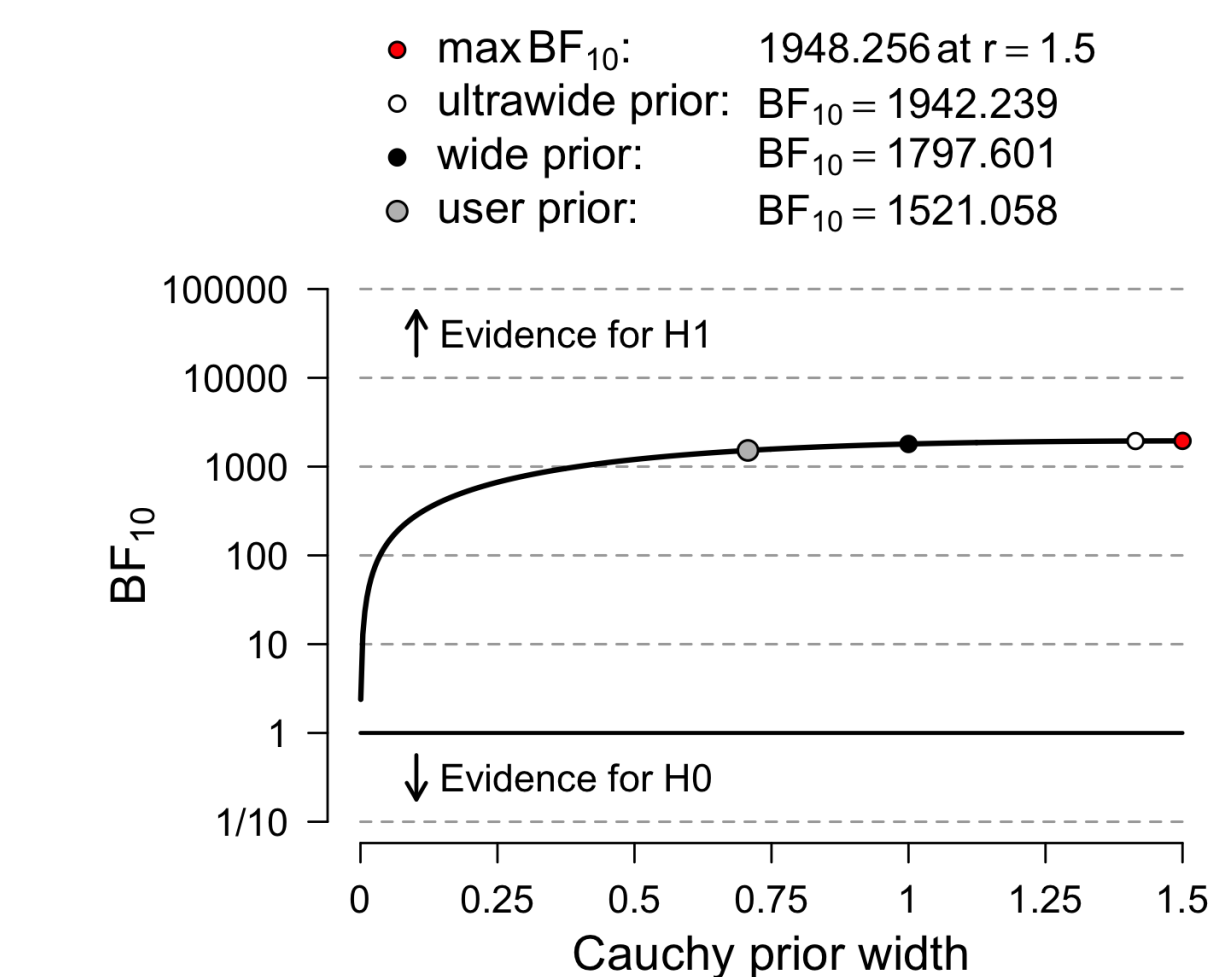

## Sequential Analysis

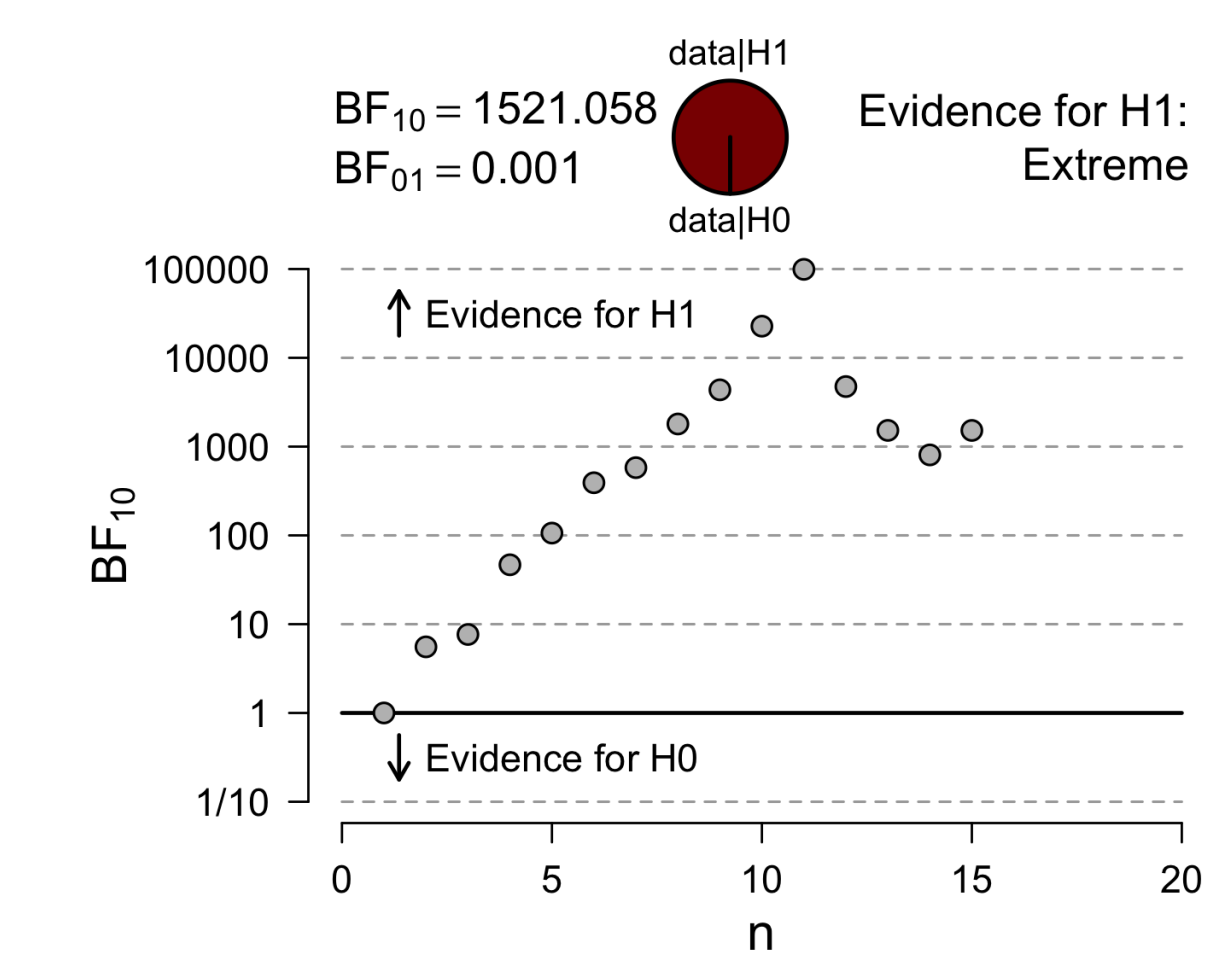

Supplement: 12874_2020_980_MOESM2_ESM.pdf [file 12874_2020_980_MOESM2_ESM.pdf]
